# Supplementary material
Source: MDPI journal article supplement (https://www.mdpi.com/2504-463X/2/4/8)
Supplement: s1 [file s1]

Archive with 1 entries (1 files):
- ohbm-1448140-supplementary.pdf
