# Supplementary material
Source: MDPI journal article supplement (https://www.mdpi.com/2504-463X/2/4/8)

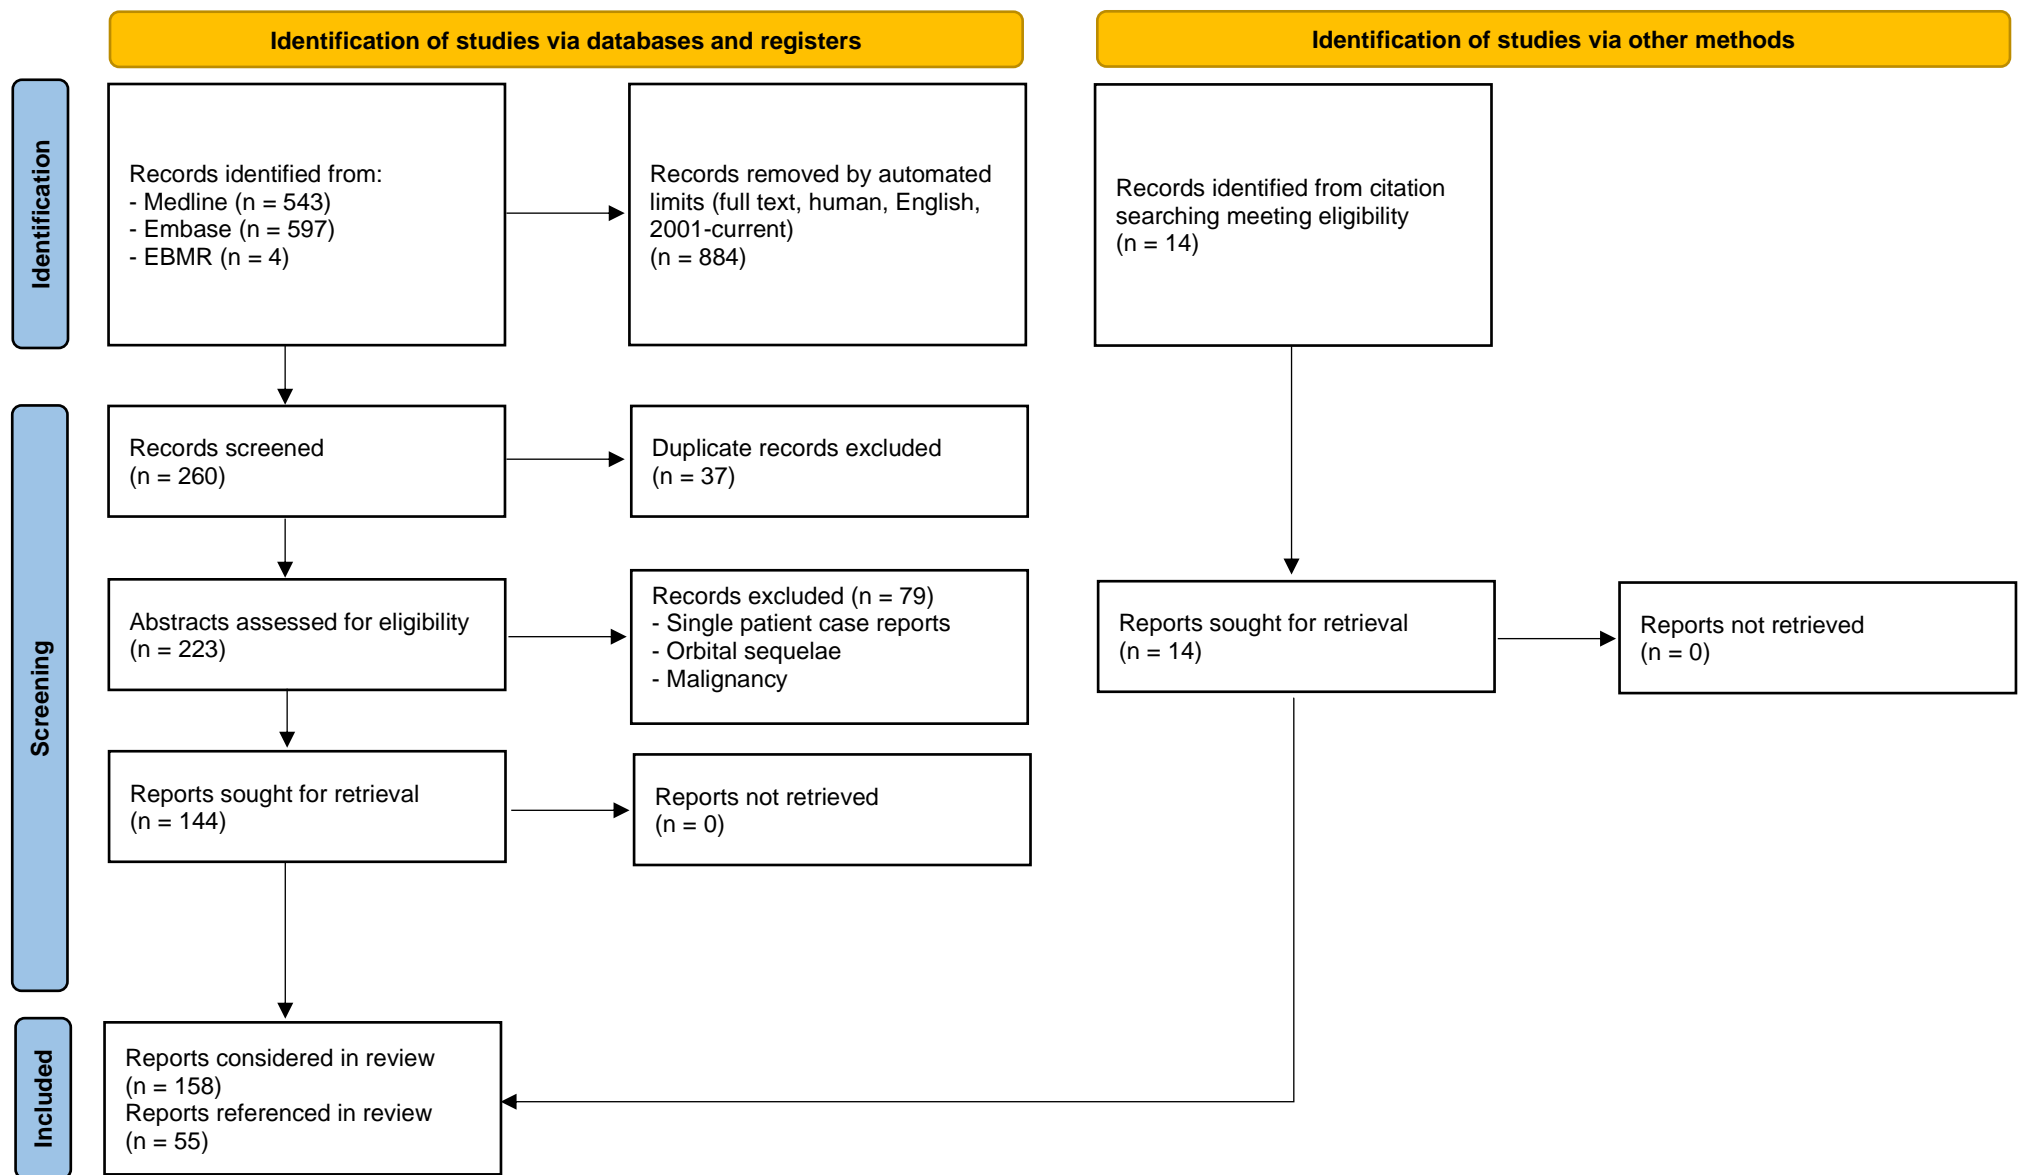

**Figure S1.** PRISMA guidelines detailing search results and the excluded articles for this paper.

Supplement: s1 [file s1 › ohbm-1448140-supplementary.pdf]
